# Supplementary material for: CMT subtypes and disease burden in patients enrolled in the Inherited Neuropathies Consortium natural history study: a cross-sectional analysis
Source: PubMed Central journal article supplement — J Neurol Neurosurg Psychiatry. 2014 Nov 27;86(8):873–8. doi: 10.1136/jnnp-2014-308826 (PMC4516002; doi:10.1136/jnnp-2014-308826), 2014-11-27
Supplement: jnnp-2014-308826-s1.pdf [file jnnp-2014-308826-s1.pdf]

**Supplementary Table 1: CMTNS scores for rare mutations. The diseases and genes are named according to OMIM (<http://www.ncbi.nlm.nih.gov/Omim/>) and HUGO (<http://www.genenames.org/>), respectively.**

| CMT subtype (mutation)  | Median CMTNS (n) | Range | First/third quartile |
|-------------------------|------------------|-------|----------------------|
| CMT4A ( <i>GDAP1</i> )  | 9 (3)            | 8-32  | 8.5/20.5             |
| CMT1F ( <i>NEFL</i> )   | 16 (7)           | 5-29  | 11/21.5              |
| CMT1E ( <i>PMP22</i> )  | 18 (5)           | 11-20 | 15/18                |
| CMT4C ( <i>SH3TC2</i> ) | 22 (7)           | 2-32  | 6.5/16               |
| HSAN1 ( <i>SPTLC1</i> ) | 13 (22)          | 2-34  | 15/27                |

**Supplementary Table 2: CMTNS scores for rare mutations with N<3\*\***

| CMT subtype (mutation)   | CMTNS     |           |           |
|--------------------------|-----------|-----------|-----------|
|                          | patient 1 | patient 2 | patient 3 |
| CMT1C ( <i>LITAF</i> )   | 6         | 20        |           |
| CMT1D ( <i>EGR2</i> )    | 16        |           |           |
| CMT2C ( <i>TRPV4</i> )   | 8         | 2         | 14        |
| CMT2D ( <i>GARS</i> )    | 2         | 5         |           |
| CMT4B1 ( <i>MTMR2</i> )  | 32        | 15        |           |
| CMT4F ( <i>PRX</i> )     | 17        |           |           |
| AR CMT2A ( <i>LMNA</i> ) | 26        |           |           |
| CMT4J ( <i>FIG4</i> )    | 3         | 17        | 29        |
| HMN5A ( <i>BSCL2</i> )   | 3         | 7         |           |

\*\*Due to low numbers summary statistics were not performed for the above mutations.

**Supplementary Table 3: Age and gender adjusted mean CMTNS scores for individual sites\*.**

| site       | Age and gender adjusted Mean CMTNS |       |       |       |
|------------|------------------------------------|-------|-------|-------|
|            | CMT1A                              | CMT1B | CMT2A | CMT1X |
| London     | 15.8                               | 15.7  | 14.4  | 16.8  |
| Milan      | 9.2                                | 9.2   | 7.9   | 10.3  |
| Detroit    | 14                                 | 13.9  | 12.6  | 15.0  |
| Iowa       | 13.2                               | 13.2  | 11.9  | 14.3  |
| all others | 13.3                               | 13.3  | 12.0  | 14.4  |

\*These are model predicted means ,which have been adjusted for age and gender.

**Supplementary Table 4: Mean CMTES scores for individual sites.**

| site       | Mean CMTNS +/- SD (n) |                  |                  |                  |
|------------|-----------------------|------------------|------------------|------------------|
|            | CMT1A                 | CMT1B            | CMT2A            | CMT1X            |
| London     | 10.2 +/- 4.3(104)     | 14 +/- 5.6(9)    | 14.1 +/- 7.5(11) | 10.5 +/- 3.2(37) |
| Milan      | 6.6 +/- 4.2(123)      | 10.9 +/- 7.7(13) | 9.2 +/- 6.6(13)  | 7.2 +/- 4.9(24)  |
| Detroit    | 8.3 +/- 5.6(144)      | 8.4 +/- 5.7(19)  | 10.8 +/- 7.8(17) | 10.2 +/- 6.0(23) |
| Iowa       | 7.3 +/- 4.8(39)       | 8.7 +/- 6.8(3)   | 11.8 +/- 5.5(6)  | 5.8 +/- 6.3(4)   |
| all others | 10.1 +/- 5.3(98)      | 9.4 +/- 2.3(9)   | 7.8 +/- 4.8(9)   | 7.8 +/- 3.5(8)   |

### Supplementary Table 5: Previously reported CMT series.

The table summarizes the proportion of different types and subtypes of CMT in selected papers that describe CMT patients who were analyzed for the causative mutation. Both the numerator (the genes that were tested) and the denominator (the population of CMT patients who were analyzed) differ between each paper. The table indicates the genes that were tested, and whether HNPP, CMTDI, HSN/HSAN, and/or HMN were excluded. ND: not determined. Of note, the OMIM classification of CMT subtypes used in this table reflects that employed by the authors and differs from that used in the current study.

|                    | mutations | <sup>30</sup> Boerkoel, et al., 2002 | <sup>15</sup> Latour et al. 2006 | <sup>10</sup> Saporta et al. 2011 | <sup>21</sup> Abe et al. 2011 | <sup>19</sup> Braathan et al. 2011 | <sup>18</sup> Karadima et al. 2011 | <sup>14</sup> Murphy et al. 2012- seen in clinic | <sup>14</sup> Murphy et al. 2012- not seen in clinic | <sup>20</sup> Sivera et al. 2013 | <sup>16</sup> Gess et al., 2013 |
|--------------------|-----------|--------------------------------------|----------------------------------|-----------------------------------|-------------------------------|------------------------------------|------------------------------------|--------------------------------------------------|------------------------------------------------------|----------------------------------|---------------------------------|
| Clinical diagnosis |           |                                      |                                  |                                   |                               |                                    |                                    |                                                  |                                                      |                                  |                                 |
| HNPP               |           | excluded                             | excluded                         | 6%<br>(48/787)                    | 0.6%<br>(2/354)               | excluded                           | excluded                           | 8%<br>(46/601)                                   | 4%<br>(56/1493)                                      | excluded                         | 14%<br>(83/589)                 |
| CMT1               |           | 94%<br>(145/153)                     | 100%<br>(968/968)                | 55%<br>(434/787)                  | 62%<br>(111/354)              | 49%<br>(92/187)                    | 100%<br>(243/243)                  | 40%<br>(240/601)                                 | 30%<br>(446/1493)                                    | 63%<br>(275/438)                 | 60%<br>(355/589)                |
| CMT2               |           | 4%<br>(6/153)                        | excluded                         | 12%<br>(96/787)                   | 36%<br>(127/354)              | 47%<br>(88/187)                    | excluded                           | 19%<br>(115/601)                                 | 22%<br>(335/1493)                                    | 37%<br>(163/438)                 | 26%<br>(151/589)                |
| CMTDI              |           | excluded                             | excluded                         | 4%<br>(31/787)                    | excluded                      | 3%<br>(7/187)                      | excluded                           | 10%<br>(62/601)                                  | 2%<br>(23/1493)                                      | excluded                         | excluded                        |
| HSN/HSAN           |           | excluded                             | excluded                         | 2%<br>(17/787)                    | excluded                      | excluded                           | excluded                           | 11%<br>(69/601)                                  | 9%<br>(129/1493)                                     | excluded                         | excluded                        |
| HMN                |           | excluded                             | excluded                         | 1%<br>(7/787)                     | excluded                      | excluded                           | excluded                           | 10%<br>(61/601)                                  | 8%<br>(126/1493)                                     | excluded                         | excluded                        |
| other/<br>unknown  |           | 3%<br>(2/153)                        | excluded                         | 20%<br>(154/787)                  | 1%<br>(5/354)                 | excluded                           | excluded                           | 1%<br>(8/601)                                    | 25%<br>(378/1493)                                    | excluded                         | excluded                        |
| Total (all         |           | 153                                  | 968                              | 787                               | 354                           | 187                                | 243                                | 601                                              | 1493                                                 | 438                              | 589                             |



### Supplementary Table 6: Previously reported CMT series.

The table summarizes the proportion of different types and subtypes of CMT in selected papers that describe CMT patients who were analyzed for the causative mutation. Both the numerator (the genes that were tested) and the denominator (the population of CMT patients who were analyzed) differ between each paper. The table indicates the genes that were tested, and whether HNPP, CMTDI, HSN/HSAN, and/or HMN were excluded. ND: not determined. Of note, the OMIM classification of CMT subtypes used in this table reflects that employed by the authors and differs from that used in the current study.

|                                                            | mutations                | <sup>30</sup> Boerkoel, et al., 2002 | <sup>15</sup> Latour et al. 2006 | <sup>10</sup> Saporta et al. 2011 | <sup>21</sup> Abe et al. 2011 | <sup>19</sup> Braathan et al. 2011 | <sup>18</sup> Karadima et al. 2011 | <sup>14</sup> Murphy et al. 2012- seen in clinic | <sup>14</sup> Murphy et al- not seen in clinic | <sup>20</sup> Sivera et al. 2013 | <sup>16</sup> Gess et al., 2013 |
|------------------------------------------------------------|--------------------------|--------------------------------------|----------------------------------|-----------------------------------|-------------------------------|------------------------------------|------------------------------------|--------------------------------------------------|------------------------------------------------|----------------------------------|---------------------------------|
| <b>Demyelinating - HNPP, CMT1, and autosomal recessive</b> |                          |                                      |                                  |                                   |                               |                                    |                                    |                                                  |                                                |                                  |                                 |
| HNPP                                                       | <i>PMP22</i> mutation    | excluded                             | excluded                         | 6% (48/787)                       | 0.6% (2/354)                  | excluded                           | excluded                           | 5% (31/601)                                      | 1% (21/1493)                                   | excluded                         | 9% (53/589)                     |
| CMT1A                                                      | <i>PMP22</i> duplication | 52% (79/153)                         | 77% (741/968)                    | 55% (290/787)                     | 14% (50/354)                  | 20% (37/187)                       | 26% (63/243)                       | 28% (168/601)                                    | 17% (247/1493)                                 | 49% (184/438)                    | 31% (180/589)                   |
| CMT1B                                                      | <i>MPZ</i>               | 3% (5/153)                           | 6% (59/968)                      | 9% (45/787)                       | 6% (20/354)                   | 1% (2/187)                         | 0.4% (1/243)                       | 2% (13/601)                                      | 1% (18/1493)                                   | 4% (19/438)                      | 3% (19/589)                     |
| CMT1C                                                      | <i>LITAF</i>             | ND                                   | 0.6% (6/968)                     | 1% (5/787)                        | 0%                            | 0%                                 | ND                                 | 0.7% (4/601)                                     | 0.1% (2/1493)                                  | 0%                               | 0%                              |
| CMT1D                                                      | <i>EGR2</i>              | 0.7% (1/153)                         | 0.1% (1/968)                     | 0.2% (1/787)                      | 0.3% (1/354)                  | 0%                                 | ND                                 | 0%                                               | 0.2% (4/1493)                                  | 0%                               | 0%                              |
| CMT1E                                                      | <i>PMP22</i> other       | 3% (5/153)                           | 0.3% (3/968)                     | 1% (5/787)                        | 4% (10/354)                   | 0%                                 | ND                                 | 1% (6/601)                                       | 0.3% (5/1493)                                  | 0.5% (2/438)                     | 0.7% (4/589)                    |
| CMT1F                                                      | <i>NEFL</i>              | 0%                                   | 0.5% (5/968)                     | 0% (0/787)                        | 2% (8/354)                    | 0%                                 | ND                                 | 0%                                               | 0.1% (2/1493)                                  | 0.3% (1/438)                     | 0%                              |
| CMT1X                                                      | <i>GJB1</i>              | 7% (11/153)                          | 11% (106/968)                    | 15% (80/787)                      | 7% (25/354)                   | 5% (9/187)                         | 5% (12/243)                        | 8% (46/601)                                      | 7% (101/1493)                                  | 15% (56/438)                     | 8% (47/589)                     |
|                                                            | <i>FBLN5</i>             | ND                                   | ND                               | ND                                | ND                            | ND                                 | ND                                 | ND                                               | ND                                             | ND                               | ND                              |
|                                                            | <i>ARHGEF1</i>           | ND                                   | ND                               | ND                                | ND                            | ND                                 | ND                                 | ND                                               | ND                                             | ND                               | ND                              |
| CMT4A                                                      | <i>GDAP1</i>             | ND                                   | ND                               | 0.2% (1/787)                      | 0%                            | ND                                 | ND                                 | 0.3% (2/601)                                     | 0.7% (10/1493)                                 | 11% (42/438)                     | 0%                              |
| CMT4B1                                                     | <i>MTMR2</i>             | ND                                   | ND                               | ND                                | 0%                            | ND                                 | ND                                 | 0.2%                                             | 0.1%                                           | 0%                               | 0%                              |

|               |               |                 |          |                 |                 |               |          |                 |                  |                 |                 |
|---------------|---------------|-----------------|----------|-----------------|-----------------|---------------|----------|-----------------|------------------|-----------------|-----------------|
|               |               |                 |          |                 |                 |               |          | (1/601)         | (1/1493)         |                 |                 |
| CMT4B2        | <i>MTMR13</i> | ND              | ND       | ND              | 0%              | ND            | ND       | ND              | ND               | 0%              | ND              |
| CMT4B3        | <i>SBF1</i>   | ND              | ND       | ND              | ND              | ND            | ND       | ND              | ND               | ND              | ND              |
| CMT4C         | <i>SH3TC2</i> | ND              | ND       | 0.6%<br>(3/787) | ND              | ND            | ND       | 1%<br>(5/601)   | 0.3%<br>(4/1493) | 6%<br>(28/438)  | 0%              |
| CMT4D         | <i>NDRG1</i>  | ND              | ND       | ND              | ND              | ND            | ND       | ND              | ND               | 1.9%<br>(7/438) | 0.3%<br>(2/589) |
| CMT4E         | <i>EGR2</i>   | 0%              | ND       | ND              | 0%              | 0%            | ND       | 0%              | 0%               | 0%              | 0%              |
| CMT4F         | <i>PRX</i>    | 0.7%<br>(1/153) | ND       | 0.2%<br>(1/787) | 1%<br>(5/354)   | ND            | ND       | 0.2%<br>(1/601) | 0%               | 1.1%<br>(4/438) | 0%              |
| CMT4G         | <i>HK1</i>    | ND              | ND       | ND              | ND              | ND            | ND       | ND              | ND               | 1%<br>(6/438)   | ND              |
| CMT4H         | <i>FGD4</i>   | ND              | ND       | ND              | ND              | ND            | ND       | ND              | ND               | 0.5%<br>(2/438) | 0.2%<br>(1/589) |
| CMT4J         | <i>FIG4</i>   | ND              | ND       | 0.4%<br>(2/787) | ND              | ND            | ND       | ND              | ND               | 0%              | ND              |
| <b>CMTDI</b>  |               |                 |          |                 |                 |               |          |                 |                  |                 |                 |
| <b>CMTDIA</b> |               | excluded        | excluded |                 | excluded        |               | excluded |                 |                  | excluded        | excluded        |
| CMTDIB        | <i>DNM2</i>   | ND              | ND       | ND              | 0%              | ND            | ND       | ND              | ND               | 0%              | ND              |
| CMTDIC        | <i>YARS</i>   | ND              | ND       | ND              | 0%              | ND            | ND       | ND              | ND               | 0.2%<br>(1/438) | ND              |
| CMTDID        | <i>MPZ</i>    | ND              | ND       | ND              | ND              | ND            | ND       | ND              | ND               | ND              | ND              |
| CMTDIE        | <i>IFN2</i>   | ND              | ND       | ND              | ND              | ND            | ND       | ND              | ND               | ND              | ND              |
| CMTDIF        | <i>GNB4</i>   | ND              | ND       | ND              | ND              | ND            | ND       | ND              | ND               | ND              | ND              |
| <b>Axonal</b> |               |                 |          |                 |                 |               |          |                 |                  |                 |                 |
| CMT2A         | <i>MFN2</i>   | ND              | ND       | 4%<br>(21/787)  | 4%<br>(14/354)  | 3%<br>(6/187) | ND       | 2%<br>(12/601)  | 3%<br>(48/1493)  | 2%<br>(6/438)   | 2%<br>(12/589)  |
| CMT2B         | <i>RAB7</i>   | ND              | ND       | ND              | 0%              | ND            | ND       | ND              | ND               | 0%              | ND              |
| CMT2C         | <i>TRPV4</i>  | ND              | ND       | ND              | ND              | ND            | ND       | 0.5%<br>(3/601) | 0.1%<br>(1/1493) | 0.3%<br>(1/438) | 0%              |
| CMT2D         | <i>GARS</i>   | ND              | ND       | 0.6%<br>(3/787) | 0.3%<br>(1/354) | ND            | ND       | ND              | ND               | 0.9%<br>(4/438) | 0.3%<br>(2/589) |
| CMT2E         | <i>NEFL</i>   | 0.7%            | ND       | 0.8%            | 0%              | ND            | ND       | 0.3%            | (2/1493)         | 0.9%            | 0%              |



|                     |                |          |          |    |          |          |          |                 |                  |                 |                 |
|---------------------|----------------|----------|----------|----|----------|----------|----------|-----------------|------------------|-----------------|-----------------|
| ARCMT2              | <i>PLEKHG5</i> | ND       | ND       | ND | ND       | ND       | ND       | ND              | ND               | ND              | ND              |
| GAN                 | <i>GAN</i>     | ND       | ND       | ND | ND       | ND       | ND       | 0.2%<br>(1/601) | 0%               | 0%              | 2%<br>(9/589)   |
| <u>HSAN and HSN</u> |                | excluded | excluded |    | excluded | excluded | excluded |                 |                  | excluded        | excluded        |
| HSN reflux          |                |          |          |    |          |          |          |                 |                  |                 | ND              |
| HSN1A               | <i>SPTLC1</i>  | ND       | ND       | ND | ND       |          | ND       | 2%<br>(14/601)  | 0%               | ND              | ND              |
| HSN1B               |                |          |          |    |          |          |          |                 |                  |                 |                 |
| HSN1C               | <i>SPTLC2</i>  | ND       | ND       | ND | ND       |          | ND       | 1%<br>(5/601)   | 0%               | ND              | ND              |
| HSN1D               | <i>ATL1</i>    | ND       | ND       | ND | ND       |          | ND       | ND              | ND               | ND              | ND              |
| HSN1E               | <i>DNMT1</i>   | ND       | ND       | ND | ND       |          | ND       | ND              | ND               | ND              | ND              |
| HSAN2A              | <i>WNK1</i>    | ND       | ND       | ND | ND       |          | ND       | ND              | ND               | ND              | ND              |
| HSN2B               | <i>FAM134</i>  | ND       | ND       | ND | ND       |          | ND       | 0.2%<br>(1/601) | 0%               | ND              | ND              |
| HSN2C               | <i>KIF1A</i>   | ND       | ND       | ND | ND       |          | ND       | ND              | ND               | ND              | ND              |
| HSN2D               | <i>SCN9A</i>   | ND       | ND       | ND | ND       |          | ND       | ND              | ND               | ND              | ND              |
| HSAN3               | <i>IKBKAP</i>  | ND       | ND       | ND | ND       |          | ND       | ND              | ND               | ND              | ND              |
| HSAN4               | <i>NTRKA</i>   | ND       | ND       | ND | ND       |          | ND       | ND              | ND               | ND              | ND              |
| HSAN5               | <i>NGFB</i>    | ND       | ND       | ND | ND       |          | ND       | 0.2%<br>(1/601) | 0%               | ND              | ND              |
| HSAN6               | <i>DST</i>     | ND       | ND       | ND | ND       |          | ND       | ND              | ND               | ND              | ND              |
| <u>HMN</u>          |                | excluded | excluded |    | excluded | excluded | excluded |                 |                  | excluded        | excluded        |
| HMN1                |                |          |          |    |          |          |          |                 |                  |                 |                 |
| HMN2A               | <i>HSPB8</i>   | ND       | ND       | ND | ND       |          | ND       | 0.2%<br>(1/601) | 0%               | 0%              | 0%              |
| HMN2B               | <i>HSPB1</i>   | ND       | ND       | ND | ND       |          | ND       | 1%<br>(5/601)   | 0.1%<br>(1/1493) | 1.9%<br>(7/438) | 0%              |
| HMN2C               | <i>HSPB3</i>   | ND       | ND       | ND | ND       |          | ND       | ND              | ND               | ND              | ND              |
| HMN2                | <i>FBLN5</i>   | ND       | ND       | ND | ND       |          | ND       | ND              | ND               | ND              | ND              |
| HMN2                | <i>HARS</i>    | ND       | ND       | ND | ND       |          | ND       | ND              | ND               | ND              | ND              |
| HMN5A               | <i>GARS</i>    | ND       | ND       | ND | ND       |          | ND       |                 | ND               | 1.1%<br>(4/438) | 0.3%<br>(2/589) |



|                       |                |    |    |    |    |  |    |                 |                  |    |    |
|-----------------------|----------------|----|----|----|----|--|----|-----------------|------------------|----|----|
| HMN5A                 | <i>BSCL2</i>   | ND | ND | ND | ND |  | ND | 0.2%<br>(1/601) | 0.1%<br>(1/1493) | 0% | 0% |
| HMN2C                 | <i>REEP1</i>   | ND | ND | ND | ND |  | ND | ND              | ND               | ND | ND |
| HMN2                  | <i>SPAST</i>   | ND | ND | ND | ND |  | ND | ND              | ND               | ND | ND |
| HMN2                  | <i>SETX</i>    | ND | ND | ND | ND |  | ND | ND              | ND               | ND | ND |
| DSMA1                 | <i>IGHMBP2</i> | ND | ND | ND | ND |  | ND | ND              | ND               | ND | ND |
| DSMA2                 |                |    |    |    |    |  |    |                 |                  |    |    |
| DSMA3                 |                |    |    |    |    |  |    |                 |                  |    |    |
| DSMA4                 | <i>PLEKHG5</i> | ND | ND | ND | ND |  | ND | ND              | ND               | ND | ND |
| DSMA5                 | <i>HSJ1</i>    | ND | ND | ND | ND |  | ND | ND              | ND               | ND | ND |
| DSMA6                 | <i>FBXO38</i>  | ND | ND | ND | ND |  | ND | ND              | ND               | ND | ND |
| SMA                   | <i>SMN</i>     | ND | ND | ND | ND |  | ND | 0.2%<br>(1/601) | ND               | ND | ND |
| HMN7A                 | <i>SLC5A7</i>  | ND | ND | ND | ND |  | ND | ND              | ND               | ND | ND |
| HMN7B                 | <i>DCTN1</i>   | ND | ND | ND | ND |  | ND | ND              | ND               | ND | ND |
| SMA3                  | <i>ATP7A</i>   | ND | ND | ND | ND |  | ND | ND              | ND               | ND | ND |
| scapulo-peroneal SMA  | <i>TRPV4</i>   | ND | ND | ND | ND |  | ND | ND              | ND               | 0% | 0% |
| congenital distal SMA | <i>TRPV4</i>   | ND | ND | ND | ND |  | ND | ND              | ND               | 0% | 0% |
| SMALED1               | <i>DYNC1HI</i> | ND | ND | ND | ND |  | ND | ND              | ND               | ND | ND |
| SMALED2               | <i>BICD2</i>   | ND | ND | ND | ND |  | ND | ND              | ND               | ND | ND |
